# Supplementary material
Source: publisher figshare collection journal article supplement (https://gsajournals.figshare.com/ndownloader/files/29131176)
Supplement: Supplementary file 1 [file 29131176]

## Sheet: Table S4A
Table S4A. Comparing with previous estimations of the adaptation rates α in humans
	Sweeps (incomplete and complete sweeps)
		95%CI			95%CI			95%CI			95%CI					generation	3500
Human lineage	Xa	lower-upper		Xgb	lower-upper		αc	lower-upper		αd	lower-upper					T human chip
Africae	68	46	90.6	0.0194286	0.0131429	0.0258857	0.176863	0.119642	0.235643	0.270891	0.18325	0.360922				7900000	12100000
Africaf	58	37	81	0.0165714	0.0105714	0.0231429	0.150853	0.096234	0.210674	0.231054	0.147396	0.322679				272414	417241		generation interval Moorjani PNAS 2016			29
Uricchio et al 2019							0.135	0.096	0.17							NS tot (Uricchio)	29925
Zhen et al 2021g							0.06									NS selected
Zhen et al 2021h							0.16									5292.61	3580.3	7051.63	8106.4	5483.74	10800.6
Human-chimp																4514.29	2879.8	6304.43	6914.29	4410.84	9656.16
Zhen et al 2021g							0.11
Zhen et al 2021h							0.25
aPoint estimates and 95% CIs edges averaged across populations of the same continental origin
bXg stands for X per generation, i.e., X divided by the 3,500 simulated generations
c,dPrediction using X per generation, 29,925 nonsynonymous and 7,9Ky or 1,2Ky of human-chimp divergence
eEstimations obtained using the 1000G ORs averaged across chromosomes (Table 1)
fEstimations obtained using the 1000G ORs computed merging chromosomes (Table 1)
g,hEstimations under the simple and complex models presented in Zhen et al. (2021)

## Sheet: Table S4B
Table S4B. Comparing with Drosophila
	Sweeps (incomplete and complete sweeps)																											base pairs analysed	3000000000
		95%CI				95%CI						95%CI				95%CI				95%CI				95%CI				simulated generations	3500
Human	X	lower-upper			X/gen	lower-upper			S		λ	lower-upper			λS	lower-upper			2Nλ	lower-upper			2NλS	lower-upper				human effective populations size, N	10000
Africaa	68	46	91		0.0194286	0.0131429	0.026		0.013		6.47619e-12	4.38095e-12	8.66667e-12		8.41905e-14	8.51156e-14	1.13905e-13		1.29524e-07	8.7619e-08	1.73333e-07		1.68381e-09	1.13905e-09	2.25333e-09
Europea	115	68	160		0.0328571	0.0194286	0.0457143		0.01		1.09524e-11	6.47619e-12	1.52381e-11		1.09524e-13	2.12789e-13	2.96054e-13		2.19048e-07	1.29524e-07	3.04762e-07		2.19048e-09	1.29524e-09	3.04762e-09
East Asiaa	165	119	211		0.0471429	0.034	0.0602857		0.011		1.57143e-11	1.13333e-11	2.00952e-11		1.72857e-13	5.34286e-13	6.83238e-13		3.14286e-07	2.26667e-07	4.01905e-07		3.45714e-09	2.49333e-09	4.42095e-09
Africab	58	37	81		0.0165714	0.0105714	0.0231429		0.01352		5.52381e-12	3.52381e-12	7.71429e-12		7.46819e-14	5.83946e-14	8.1551e-14		1.10476e-07	7.04762e-08	1.54286e-07		1.49364e-09	9.52838e-10	2.08594e-09
Europeb	84	40	130		0.024	0.0114286	0.0371429		0.00956		8e-12	3.80952e-12	1.2381e-11		7.648e-14	9.14286e-14	1.41497e-13		1.6e-07	7.61905e-08	2.47619e-07		1.5296e-09	7.28381e-10	2.36724e-09
East Asiab	128	83	173		0.0365714	0.0237143	0.0494286		0.01168		1.21905e-11	7.90476e-12	1.64762e-11		1.42385e-13	2.89088e-13	3.90721e-13		2.4381e-07	1.58095e-07	3.29524e-07		2.8477e-09	1.84655e-09	3.84884e-09
Drosophilac									S		λ				λS				2Nλ				2NλS
Jensen et al 2008									0.011		7.9e-12				8.69e-14				3.9e-05				4.3e-07
Mcpherson et al 2007									0.010		3.6e-12				3.6e-14				1.1e-05				1.1e-07
Jensen et al 2008									0.002		4.2e-11				8.4e-14				0.0002				4e-07
Li and Stephan 2006									0.002		1.1E-11				2.2e-14				1.9E-04				3.9E-07
Andolfatto 2007									1.2e-05		6.9e-10				8.28e-15				0.0026				2.6e-08
aEstimations obtained using the 1000G ORs averaged across chromosomes (Tables 1 and 2)
bEstimations obtained using the 1000G ORs computed merging chromosomes (Tables 1 and 2)
cValues from Table 3 of Jensen et al (2008)
